# Supplementary material for: Palmitoylation induced activation of SMAD3 exacerbates colitis by promoting TRM cells differentiation
Source: Research Square preprint supplement (doi:10.21203/rs.3.rs-7804610/v1), 2025-10-23
Supplement: Supplementary file 1 [file d2cbdcd5be9b0c454285bcad.docx]

**Palmitoylation induced activation of SMAD3 exacerbates colitis by promoting TRM cells differentiation**

Yuejie Xu, Siqi Ji, Ping Jiang, Zhenguo Zhao, Qian Zhou, Dan Su, Yu Zhao, Xiaoping Zou, Mingming Zhang, Jing Sun, Guifang Xu, Jian Tang

**Supplementary Figure Legend**


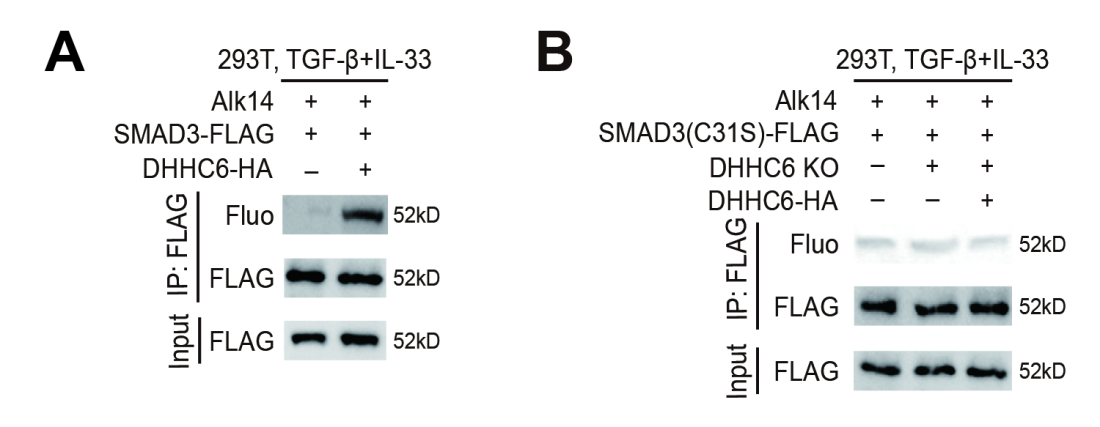


Supplementary Figure 1. (A) HEK293T cells treated with 10 ng/mL TGF-β and 100 ng/mL IL-33 were transfected with FLAG-SMAD3 and reintroduced with or without HA-DHHC6, then labeled with Alk14. The palmitoylation level of FLAG-tagged SMAD3 was detected. (B) DHHC6 WT and knockout (KO) HEK293T cells treated with 10 ng/mL TGF-β and 100 ng/mL IL-33, were transfected with FLAG-SMAD3 C31S mutant plasmid, and reintroduced with or without HA-DHHC6. The FLAG-tagged SMAD3 palmitoylation level was measured by Alk14 metabolic labeling.


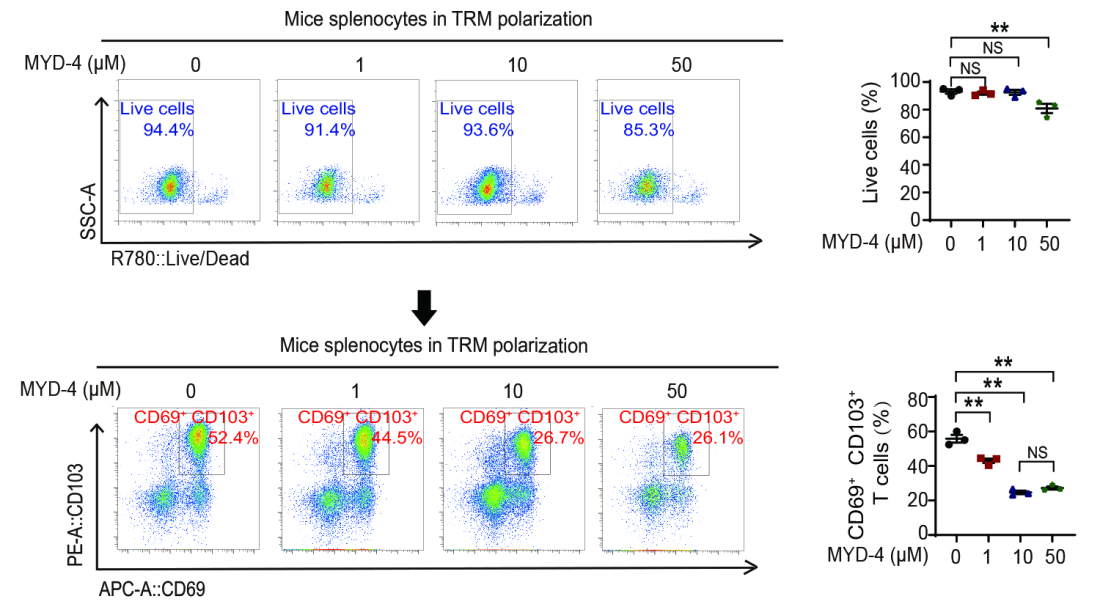


Supplementary Figure 2. Mouse splenic T cells were isolated and then cultured in TRM-polarizing condition treated with 0 μM, 1 μM, 10 μM, 50 μM MYD-4 for 72h. The percentages of live cells (upper) and TRM cells differentiation (lower) were analyzed by flow cytometry.


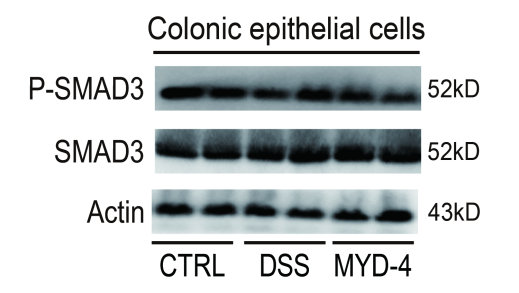


Supplementary Figure 3. C57BL/6J mice were treated with 2.5% DSS in drinking water *ad libitum*, treated with or without MYD-4 intraperitoneally. The colonic epithelial cells were isolated and the protein level of SMAD3, p-SMAD3 in the indicated groups were tested.
